# Supplementary material
Source: Royal Society of Chemistry journal article supplement (doi:10.1039/d6dt00557h)
Supplement: d6dt00557h1.pdf [file d6dt00557h1.pdf]

## Electronic Supplementary Information

# Completing the triad: synthesis, structure, and magnetic properties of kagome metals $\text{Ti}_3\text{Mn}_3\text{Sn}_4\text{Ga}$ and $\text{Hf}_3\text{Mn}_3\text{Sn}_4\text{Ga}$

*Roman A. Khalaniya,<sup>\*,a</sup> Konstantin A. Lyssenko,<sup>ab</sup> Iasmin A. Shakhmukhametova,<sup>a</sup> Nikita Shuyev,<sup>a</sup> Andrei V. Mironov,<sup>a</sup> Aleksandr N. Kulchu,<sup>a</sup> Alexey O. Polevik,<sup>a</sup> Alexander N. Samarin,<sup>c</sup> Alexey V. Bogach,<sup>ac</sup> and Andrei V. Shevelkov<sup>a</sup>*

<sup>a</sup> Department of Chemistry, Lomonosov Moscow State University, 119991, Moscow, Russia

<sup>b</sup> National Research University Higher School of Economics, 101000, Moscow, Russia

<sup>c</sup> Prokhorov General Physics Institute of the Russian Academy of Sciences, 119991, Moscow, Russia

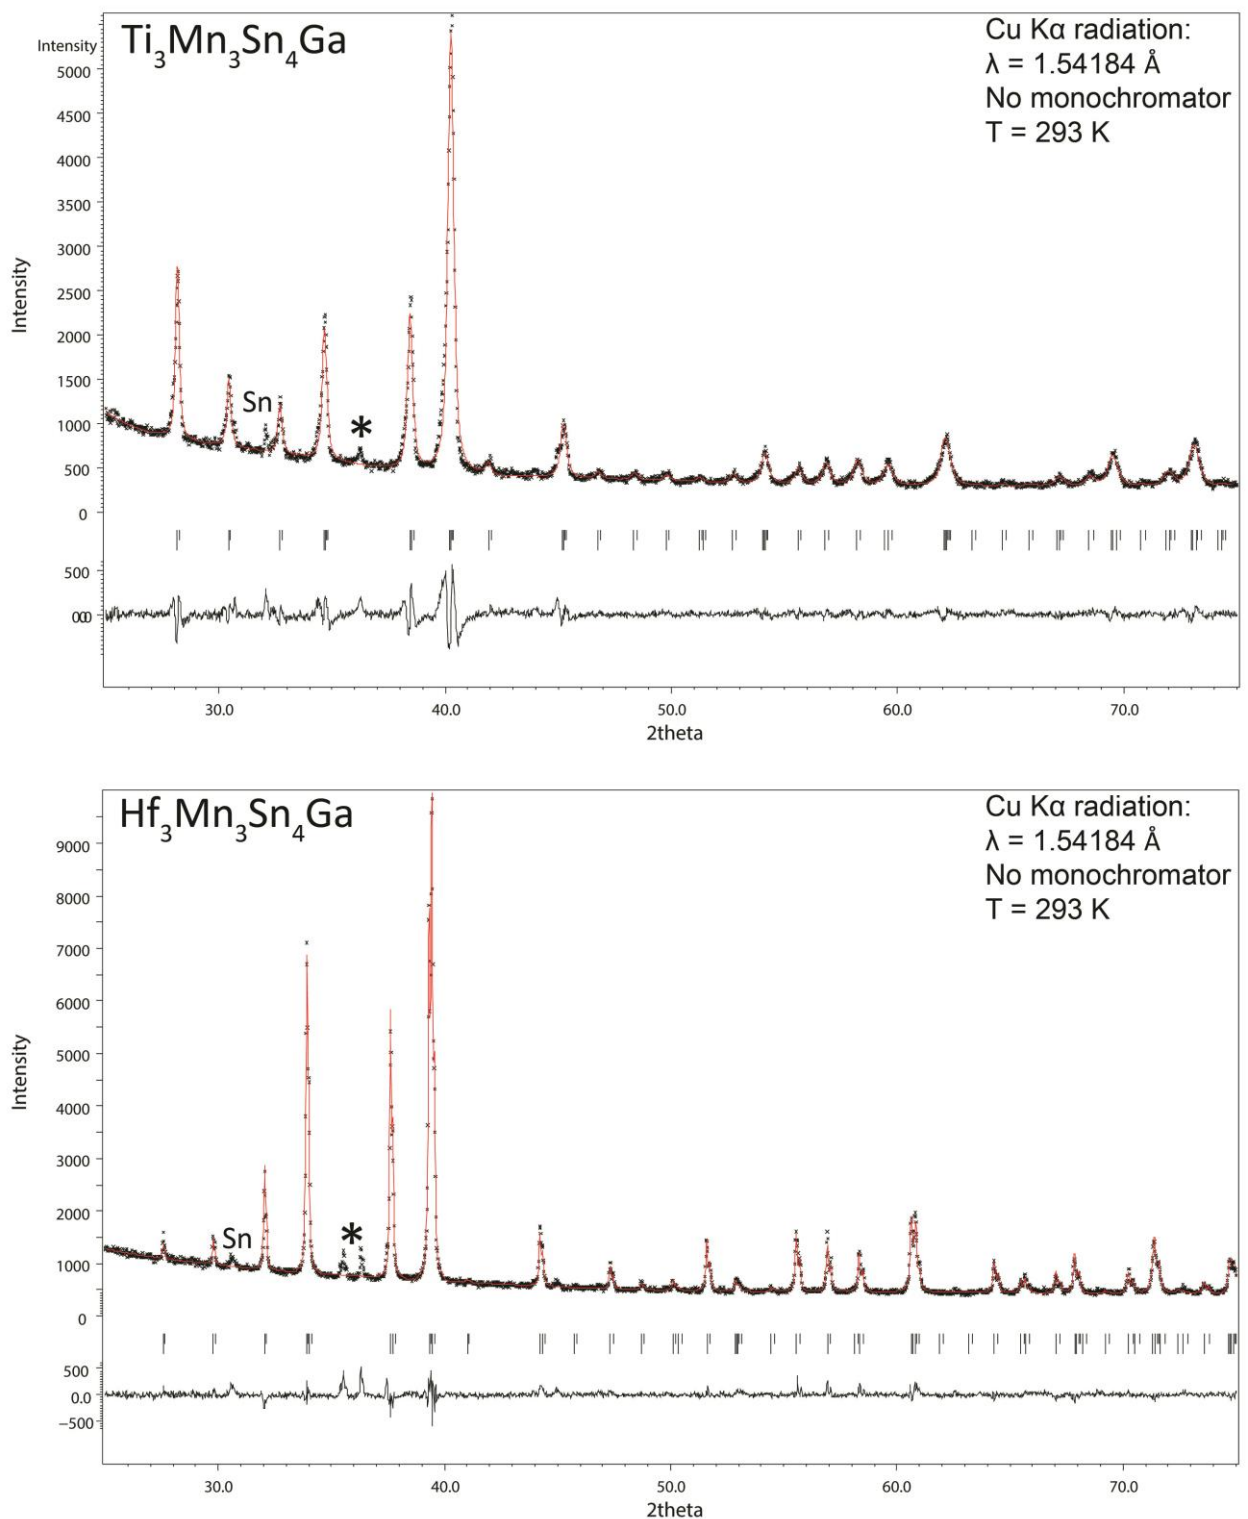

**Fig. S1.** Powder X-ray diffraction pattern of the ground  $\text{Ti}_3\text{Mn}_3\text{Sn}_4\text{Ga}$  (upper) and  $\text{Hf}_3\text{Mn}_3\text{Sn}_4\text{Ga}$  (lower) crystals. For each pattern, the upper black dots represent the experimental diffraction pattern and the red line shows the calculated pattern obtained from a le Bail fit. Peak positions are given by the ticks. The difference plot is shown by the black line in the bottom part. The diffraction peaks of unidentified phases are marked with asterisks.



**Table S1. Literature data for the interatomic distances between Ti, Hf, Mn, Sn, and Ga atoms in similar intermetallic phases**

| atom | atom | range of distances, Å | phase                                     | reference |
|------|------|-----------------------|-------------------------------------------|-----------|
| Ti   | Mn   | 2.77                  | TiMnSn <sub>4</sub>                       | [1]       |
|      |      | 2.84                  | TiMn <sub>2</sub>                         | [2]       |
|      |      | 2.90-3.01             | TiMnSi <sub>2</sub>                       | [3]       |
| Hf   | Mn   | 2.91                  | HfMn <sub>2</sub>                         | [4]       |
|      |      | 3.26                  | HfMn <sub>6</sub> Ge <sub>6</sub>         | [5]       |
|      |      | 3.5                   | HfMn <sub>6</sub> Sn <sub>6</sub>         | [6]       |
| Ti   | Sn   | 2.77-3.36             | $\alpha$ -Ti <sub>6</sub> Sn <sub>5</sub> | [7]       |
|      |      | 2.84-2.88             | TiMnSn <sub>4</sub>                       | [1]       |
|      |      | 3.07-3.28             | Ti <sub>2</sub> Sn <sub>3</sub>           | [8]       |
| Hf   | Sn   | 2.91-3.16             | HfMn <sub>6</sub> Sn <sub>6</sub>         | [6]       |
|      |      | 2.92-3.24             | Hf <sub>5</sub> Sn <sub>3</sub>           | [9]       |
| Ti   | Ga   | 2.64-2.90             | Ti <sub>2</sub> Ga <sub>3</sub>           | [10]      |
|      |      | 2.66-2.82             | Ti <sub>5</sub> Ga <sub>4</sub>           | [10]      |
|      |      | 2.68-2.89             | TiGa <sub>3</sub>                         | [10]      |
| Hf   | Ga   | 2.68-3.15             | Hf <sub>2</sub> Ga <sub>3</sub>           | [10]      |
|      |      | 2.69-3.28             | Hf <sub>11</sub> Ga <sub>10</sub>         | [10]      |
|      |      | 2.74-2.98             | HfGa <sub>3</sub>                         | [10]      |
|      |      | 2.76-2.98             | HfGa <sub>2</sub>                         | [10]      |
| Mn   | Sn   | 2.60-3.10             | Mn <sub>3</sub> Sn <sub>2</sub>           | [11]      |
|      |      | 2.70-2.82             | HfMn <sub>6</sub> Sn <sub>6</sub>         | [6]       |
|      |      | 2.83-2.88             | Ti <sub>2</sub> Sn <sub>3</sub>           | [8]       |
|      |      | 2.84                  | MnSn <sub>2</sub>                         | [12]      |
| Ti   | Ti   | 2.73-3.55             | Ti <sub>5</sub> Ga <sub>4</sub>           | [10]      |
|      |      | 2.75-3.88             | $\alpha$ -Ti <sub>6</sub> Sn <sub>5</sub> | [7]       |
|      |      | 2.95                  | TiMn <sub>2</sub>                         | [2]       |
|      |      | 2.96                  | Ti <sub>2</sub> Ga <sub>3</sub>           | [10]      |
|      |      | 3.07-3.28             | Ti <sub>2</sub> Sn <sub>3</sub>           | [8]       |
| Hf   | Hf   | 2.91-3.62             | Hf <sub>5</sub> Sn <sub>3</sub>           | [9]       |
|      |      | 3.13-3.70             | Hf <sub>11</sub> Ga <sub>10</sub>         | [10]      |
|      |      | 3.29                  | HfGa <sub>2</sub>                         | [10]      |

|    |    |           |                                           |      |
|----|----|-----------|-------------------------------------------|------|
|    |    | 3.34-3.36 | Hf <sub>2</sub> Ga <sub>3</sub>           | [10] |
| Mn | Mn | 2.34-2.50 | TiMn <sub>2</sub>                         | [2]  |
|    |    | 2.57      | HfMn <sub>6</sub> Ge <sub>6</sub>         | [5]  |
|    |    | 2.70-2.84 | Mn <sub>3</sub> Sn <sub>2</sub>           | [11] |
|    |    | 2.71      | MnSn <sub>2</sub>                         | [12] |
| Sn | Sn | 3.15-3.52 | HfMn <sub>6</sub> Sn <sub>6</sub>         | [6]  |
|    |    | 3.03-3.52 | MnSn <sub>2</sub>                         | [12] |
|    |    | 3.27      | Mn <sub>3</sub> Sn <sub>2</sub>           | [11] |
|    |    | 3.36      | Hf <sub>5</sub> Sn <sub>3</sub>           | [9]  |
|    |    | 2.85-3.58 | $\alpha$ -Ti <sub>6</sub> Sn <sub>5</sub> | [7]  |
|    |    | 3.21-3.66 | Ti <sub>2</sub> Sn <sub>3</sub>           | [8]  |
| Ga | Ga | 2.48-2.76 | Hf <sub>2</sub> Ga <sub>3</sub>           | [10] |
|    |    | 2.51-3.24 | Hf <sub>11</sub> Ga <sub>10</sub>         | [10] |
|    |    | 2.68-2.89 | TiGa <sub>3</sub>                         | [10] |
|    |    | 2.71-2.95 | Ti <sub>2</sub> Ga <sub>3</sub>           | [10] |
|    |    | 2.73-3.32 | Ti <sub>5</sub> Ga <sub>4</sub>           | [10] |
|    |    | 2.74-2.98 | HfGa <sub>3</sub>                         | [10] |
|    |    | 2.83-2.98 | HfGa <sub>2</sub>                         | [10] |

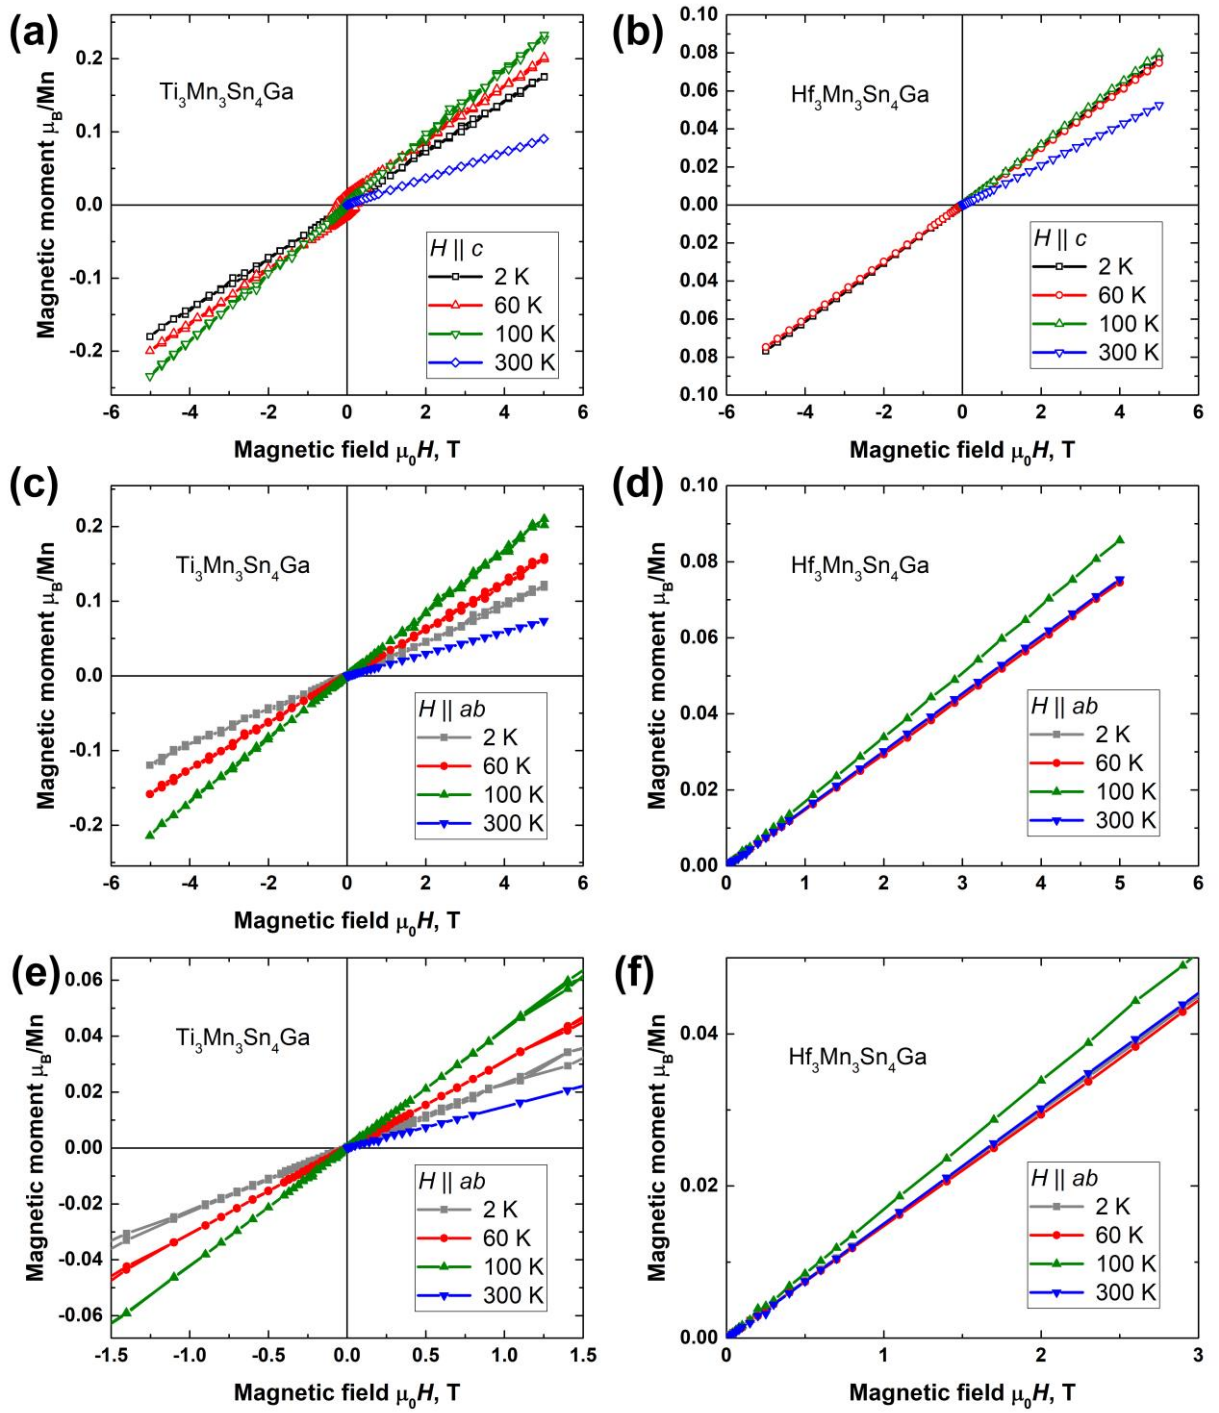

**Fig. S2.** Field dependence of magnetisation of  $\text{Ti}_3\text{Mn}_3\text{Sn}_4\text{Ga}$  (a, c, e) and  $\text{Hf}_3\text{Mn}_3\text{Sn}_4\text{Ga}$  (b, d, f) single crystals for different temperatures and orientations of magnetic field.

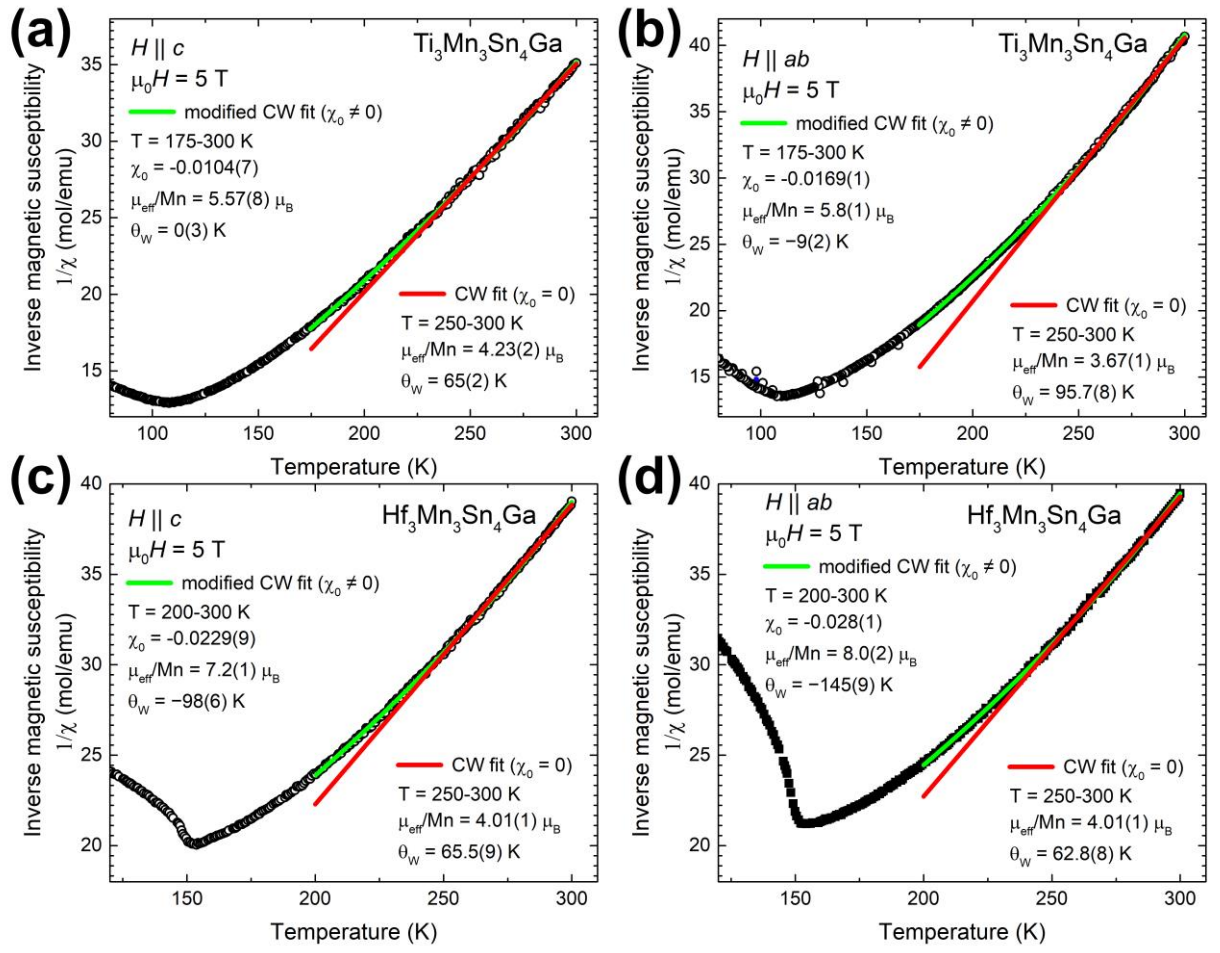

**Fig. S3.** Inverse magnetic susceptibility versus temperature of  $\text{Ti}_3\text{Mn}_3\text{Sn}_4\text{Ga}$  (a, b) and  $\text{Hf}_3\text{Mn}_3\text{Sn}_4\text{Ga}$  (c, d) single crystals in various magnetic fields. Black dots and lines represent the experimental data; red and green lines show the non-modified and modified Curie-Weiss fits, respectively. The modified Curie-Weiss fit was performed using the modified Curie-Weiss law:  $\chi = C/(T - \theta_W) + \chi_0$ , where  $C$  is the Curie constant,  $\theta_W$  is the Weiss temperature, and  $\chi_0$  is the temperature independent contribution to the susceptibility, while for the non-modified Curie-Weiss fit  $\chi_0$  was fixed at 0. The temperature ranges used for the Curie-Weiss approximations and the refined Curie-Weiss parameters are shown by the respective graphs.

The effective moment per Fe atom  $\mu_{\text{eff}}/\text{Mn}$  was calculated as  $\mu_{\text{eff}}/\text{Mn} = \sqrt{\frac{3k_B C}{n_{\text{Mn}} N_A \mu_B}}$ , where  $n_{\text{Mn}} = 3$  is the number of Mn atoms in the formula unit,  $k_B$  is the Boltzmann constant,  $N_A$  is the Avogadro number, and  $\mu_B$  is the Bohr magneton.

## References

1. A. V. Tkachuk, L. G. Akselrud, Y. V. Stadnyk and O. I. Bodak, *J. Alloys Compd.* 2000, 312(1-2), 284-287.
2. M.M.R. Costa and M.J.M. De Almeida, *Port. Phys.* 1986 17, 173-180
3. J. Steinmetz, G. Venturini, B. Roques, N. Engel, B. Chabot and E. Parthe, *Acta Crystallogr. B* 1982 38(8) 2103-2108.
4. R.P. Elliott, *Trans. Am. Soc. Met.* 1961 53, 321-329.
5. H. Ihou-Mouko, T. Mazet, O. Isnard and B. Malaman, *J. Alloys Compd.* 2006 426(1-2), 26-30.
6. T. Mazet, R. Welter and B. Malaman. *J. Alloys Compd.* 1999. 284(1-2), 54-59.
7. K. Schubert, K. Frank, R. Gohle, A. Maldonado, H. G. Meissner, A. Raman and W. Rossteutscher, *Naturwissenschaften* 1963, 50(2), 41-41.
8. B. Künnen, W. Jeitschko, G. Kotzyba and B. D. Mosel, *Z. Naturforsch. B* 2000 55(5), 425-430.
9. D. M. Bailey and J. F. Smith, *Acta Crystallogr.* 1961 14(1), 57-58.
10. M. Pötzschke and K. Schubert, *Int. J. Mater. Res.* 1962 53(7), 474-488.
11. M. Stange, H. Fjellvåg, S. Furuseth, B. C. Hauback, *J. Alloys Compd.* 1997, 259(1-2), 140-144.
12. Y. Dong and F. J. DiSalvo, *Acta Crystallogr., Sect. E: Struct. Rep. Online* 2005, 61(12), i282-i284.
